# Supplementary material for: Effect of Tourist Activities on Fecal and Salivary Glucocorticoids and Immunoglobulin A in Female Captive Asian Elephants in Thailand
Source: PubMed Central journal article supplement (PMC7589861; doi:10.3390/ani10101928), 2020-10-21
Supplement: animals-10-01928-s001.pdf [file animals-10-01928-s001.pdf]

**Table S1.** Summary of monthly mean ( $\pm$  SEM) salivary and fecal glucocorticoid and salivary and fecal immunoglobulin A concentrations throughout the 1-year study in elephant camps offering saddle riding, bareback riding, or no riding.

| Month     | Saddle                     |                                 |                           |                               | Bareback                   |                                 |                           |                               | Non-ride                   |                                 |                           |                               |
|-----------|----------------------------|---------------------------------|---------------------------|-------------------------------|----------------------------|---------------------------------|---------------------------|-------------------------------|----------------------------|---------------------------------|---------------------------|-------------------------------|
|           | FGM<br>(ng/g)              | Salivary<br>cortisol<br>(ng/ml) | Fecal IgA<br>( $\mu$ g/g) | Salivary<br>IgA ( $\mu$ g/ml) | FGM<br>(ng/g)              | Salivary<br>cortisol<br>(ng/ml) | Fecal IgA<br>( $\mu$ g/g) | Salivary<br>IgA ( $\mu$ g/ml) | FGM<br>(ng/g)              | Salivary<br>cortisol<br>(ng/ml) | Fecal IgA<br>( $\mu$ g/g) | Salivary<br>IgA ( $\mu$ g/ml) |
| January   | 53.10 $\pm$ 4.82<br>(n=14) | 1.26 $\pm$ 0.15<br>(n=14)       | 0.82 $\pm$ 0.27<br>(n=14) | 4.62 $\pm$ 0.52<br>(n=14)     | 75.48 $\pm$ 9.64<br>(n=11) | 0.56 $\pm$ 0.06<br>(n=11)       | 1.65 $\pm$ 0.26<br>(n=11) | 6.05 $\pm$ 0.42<br>(n=11)     | 61.64 $\pm$ 4.10<br>(n=19) | 1.67 $\pm$ 0.17<br>(n=19)       | 0.93 $\pm$ 0.23<br>(n=19) | 6.33 $\pm$ 0.61<br>(n=19)     |
| February  | 25.75 $\pm$ 5.25<br>(n=14) | 1.36 $\pm$ 0.17<br>(n=14)       | 1.47 $\pm$ 0.37<br>(n=14) | 5.38 $\pm$ 0.57<br>(n=14)     | 48.48 $\pm$ 3.38<br>(n=11) | 1.19 $\pm$ 0.18<br>(n=11)       | 2.46 $\pm$ 0.39<br>(n=11) | 5.97 $\pm$ 0.75<br>(n=11)     | 35.26 $\pm$ 2.89<br>(n=19) | 1.70 $\pm$ 0.13<br>(n=19)       | 0.97 $\pm$ 0.22<br>(n=19) | 5.99 $\pm$ 0.58<br>(n=19)     |
| March     | 22.37 $\pm$ 2.51<br>(n=14) | 1.15 $\pm$ 0.40<br>(n=14)       | 0.83 $\pm$ 0.24<br>(n=14) | 4.10 $\pm$ 0.64<br>(n=14)     | 33.08 $\pm$ 5.51<br>(n=11) | 0.29 $\pm$ 0.09<br>(n=11)       | 2.59 $\pm$ 0.33<br>(n=11) | 4.46 $\pm$ 0.58<br>(n=11)     | 25.51 $\pm$ 2.92<br>(n=19) | 0.81 $\pm$ 0.14<br>(n=19)       | 1.18 $\pm$ 0.24<br>(n=19) | 4.97 $\pm$ 0.52<br>(n=19)     |
| April     | 24.47 $\pm$ 2.00<br>(n=14) | 0.69 $\pm$ 0.08<br>(n=14)       | 1.66 $\pm$ 0.48<br>(n=14) | 3.81 $\pm$ 0.77<br>(n=14)     | 38.14 $\pm$ 3.47<br>(n=11) | 0.36 $\pm$ 0.09<br>(n=11)       | 5.22 $\pm$ 0.57<br>(n=11) | 4.63 $\pm$ 0.56<br>(n=11)     | 34.20 $\pm$ 4.16<br>(n=19) | 0.85 $\pm$ 0.09<br>(n=19)       | 0.38 $\pm$ 0.13<br>(n=19) | 6.78 $\pm$ 0.86<br>(n=19)     |
| May       | 25.89 $\pm$ 2.17<br>(n=14) | 1.30 $\pm$ 0.16<br>(n=14)       | 0.97 $\pm$ 0.24<br>(n=14) | 5.18 $\pm$ 0.96<br>(n=14)     | 27.16 $\pm$ 2.71<br>(n=11) | 0.53 $\pm$ 0.07<br>(n=11)       | 1.77 $\pm$ 0.25<br>(n=11) | 6.74 $\pm$ 0.85<br>(n=11)     | 38.79 $\pm$ 4.01<br>(n=19) | 0.71 $\pm$ 0.07<br>(n=18)       | 0.94 $\pm$ 0.28<br>(n=18) | 7.21 $\pm$ 0.71<br>(n=18)     |
| June      | 21.72 $\pm$ 1.81<br>(n=14) | 0.76 $\pm$ 0.05<br>(n=14)       | 0.59 $\pm$ 0.20<br>(n=14) | 9.33 $\pm$ 1.47<br>(n=14)     | 24.07 $\pm$ 1.98<br>(n=11) | 0.58 $\pm$ 0.07<br>(n=11)       | 3.45 $\pm$ 0.64<br>(n=11) | 8.82 $\pm$ 1.70<br>(n=10)     | 28.09 $\pm$ 1.66<br>(n=19) | 0.74 $\pm$ 0.04<br>(n=19)       | 1.48 $\pm$ 0.36<br>(n=19) | 7.33 $\pm$ 1.09<br>(n=19)     |
| July      | 22.53 $\pm$ 2.30<br>(n=13) | 0.99 $\pm$ 0.18<br>(n=14)       | 0.58 $\pm$ 0.14<br>(n=14) | 8.96 $\pm$ 3.56<br>(n=14)     | 21.13 $\pm$ 1.46<br>(n=11) | 0.47 $\pm$ 0.05<br>(n=11)       | 0.88 $\pm$ 0.30<br>(n=11) | 13.47 $\pm$ 3.18<br>(n=11)    | 32.31 $\pm$ 1.87<br>(n=19) | 0.64 $\pm$ 0.05<br>(n=17)       | 0.55 $\pm$ 0.15<br>(n=19) | 7.71 $\pm$ 1.63<br>(n=18)     |
| August    | 24.94 $\pm$ 2.43<br>(n=13) | 0.47 $\pm$ 0.09<br>(n=14)       | 0.71 $\pm$ 0.14<br>(n=14) | 9.83 $\pm$ 2.64<br>(n=14)     | 28.84 $\pm$ 3.72<br>(n=11) | 0.31 $\pm$ 0.05<br>(n=9)        | 1.50 $\pm$ 0.23<br>(n=11) | 17.43 $\pm$ 3.87<br>(n=9)     | 33.79 $\pm$ 3.69<br>(n=19) | 0.30 $\pm$ 0.04<br>(n=17)       | 0.49 $\pm$ 0.16<br>(n=19) | 7.40 $\pm$ 1.16<br>(n=17)     |
| September | 41.83 $\pm$ 3.08<br>(n=14) | 0.51 $\pm$ 0.04<br>(n=14)       | 0.48 $\pm$ 0.14<br>(n=14) | 14.60 $\pm$ 2.57<br>(n=14)    | 26.93 $\pm$ 2.99<br>(n=11) | 0.45 $\pm$ 0.06<br>(n=11)       | 2.08 $\pm$ 0.44<br>(n=11) | 10.85 $\pm$ 1.72<br>(n=11)    | 22.06 $\pm$ 2.07<br>(n=19) | 0.40 $\pm$ 0.04<br>(n=19)       | 0.57 $\pm$ 0.19<br>(n=19) | 5.17 $\pm$ 0.78<br>(n=18)     |
| October   | 24.21 $\pm$ 2.13<br>(n=14) | 0.56 $\pm$ 0.14<br>(n=14)       | 0.55 $\pm$ 0.14<br>(n=14) | 5.95 $\pm$ 1.41<br>(n=14)     | 36.15 $\pm$ 4.13<br>(n=10) | 0.34 $\pm$ 0.06<br>(n=11)       | 2.00 $\pm$ 0.30<br>(n=11) | 6.10 $\pm$ 1.48<br>(n=11)     | 30.87 $\pm$ 3.20<br>(n=19) | 0.44 $\pm$ 0.05<br>(n=19)       | 0.50 $\pm$ 0.13<br>(n=19) | 8.10 $\pm$ 1.49<br>(n=19)     |
| November  | 26.35 $\pm$ 1.91<br>(n=14) | 0.53 $\pm$ 0.16<br>(n=14)       | 1.04 $\pm$ 0.33<br>(n=14) | 14.55 $\pm$ 4.21<br>(n=14)    | 39.05 $\pm$ 5.97<br>(n=11) | 0.24 $\pm$ 0.04<br>(n=11)       | 1.54 $\pm$ 0.34<br>(n=11) | 19.50 $\pm$ 6.57<br>(n=11)    | 56.33 $\pm$ 7.76<br>(n=19) | 0.39 $\pm$ 0.06<br>(n=19)       | 0.83 $\pm$ 0.30<br>(n=19) | 10.05 $\pm$ 2.26<br>(n=19)    |
| December  | 27.15 $\pm$ 1.67<br>(n=14) | 0.81 $\pm$ 0.08<br>(n=14)       | 1.23 $\pm$ 0.27<br>(n=14) | 14.17 $\pm$ 3.18<br>(n=14)    | 35.68 $\pm$ 5.75<br>(n=11) | 0.56 $\pm$ 0.09<br>(n=11)       | 2.53 $\pm$ 0.50<br>(n=9)  | 25.25 $\pm$ 6.57<br>(n=10)    | 41.27 $\pm$ 4.24<br>(n=19) | 0.79 $\pm$ 0.06<br>(n=19)       | 0.71 $\pm$ 0.16<br>(n=19) | 17.70 $\pm$ 2.26<br>(n=18)    |

**Table S2** Age of participating elephants

| Age   | Number of participating elephants |          |           |
|-------|-----------------------------------|----------|-----------|
|       | Saddle                            | Bareback | No-riding |
| 1-10  |                                   | 1        | 2         |
| 11-20 |                                   | 2        | 5         |
| 21-30 | 5                                 | 3        | 2         |
| 31-40 | 3                                 | 1        | 6         |
| 41-50 | 6                                 | 3        | 3         |
| 51-60 |                                   | 1        | 1         |

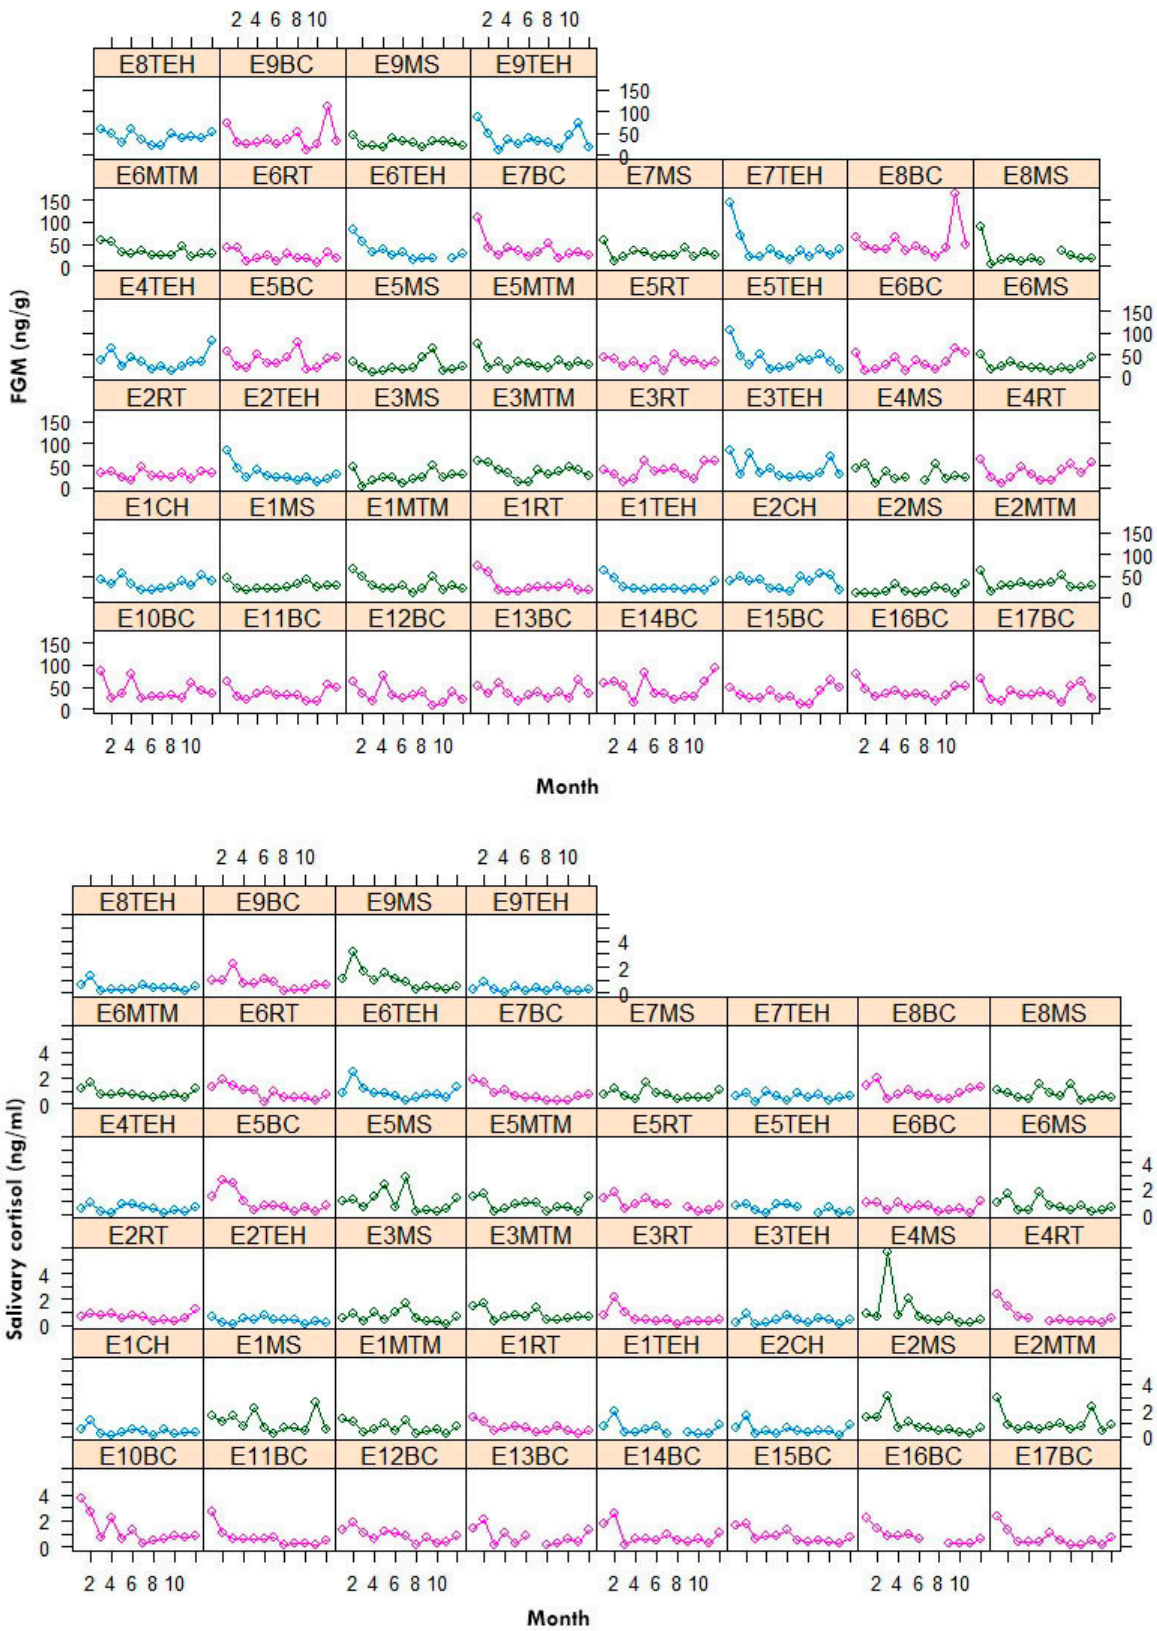

**Figure S1.** Monthly fecal glucocorticoid metabolite (FGM; ng/g) and salivary cortisol (ng/ml) concentrations in each individual participating elephant.

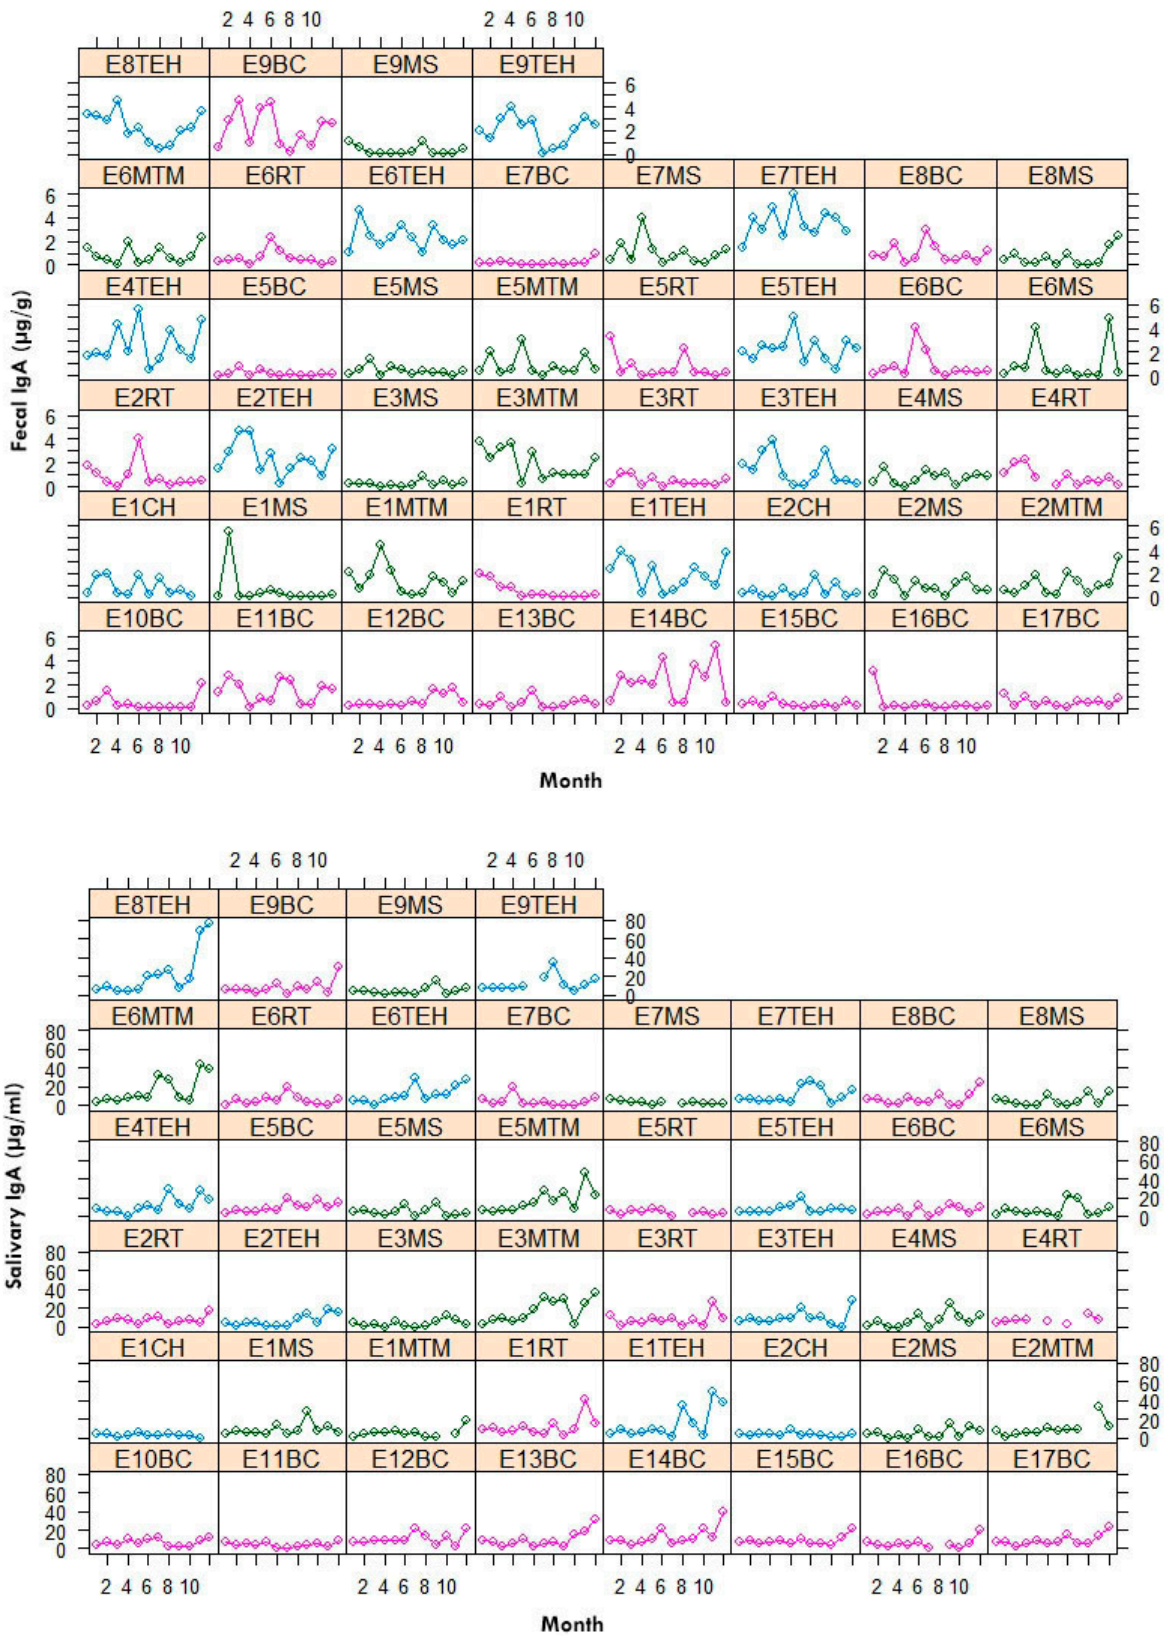

Figure S2 Monthly fecal ( $\mu\text{g/g}$ ) and salivary ( $\mu\text{g/ml}$ ) IgA concentrations in each individual participating elephant.
